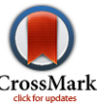

# Complete Chloroplast Genome Sequence of Poisonous and Medicinal Plant *Datura stramonium*: Organizations and Implications for Genetic Engineering

Yang Yang<sup>1</sup>\*, Dang Yuanye<sup>1</sup>\*, Li Qing<sup>2</sup>, Lu Jinjian<sup>1</sup>, Li Xiwen<sup>1,3\*</sup>, Wang Yitao<sup>1\*</sup>

**1** State Key Laboratory of Quality Research in Chinese Medicine, Institute of Chinese Medical Sciences, University of Macau, Macau, China, **2** Department of Pharmacy, Shanghai Changzheng Hospital, Second Military Medical University, Shanghai, China, **3** Institute of Chinese Materia Medica, China Academy of Chinese Medical Sciences, Beijing, China

## Abstract

*Datura stramonium* is a widely used poisonous plant with great medicinal and economic value. Its chloroplast (cp) genome is 155,871 bp in length with a typical quadripartite structure of the large (LSC, 86,302 bp) and small (SSC, 18,367 bp) single-copy regions, separated by a pair of inverted repeats (IRs, 25,601 bp). The genome contains 113 unique genes, including 80 protein-coding genes, 29 tRNAs and four rRNAs. A total of 11 forward, 9 palindromic and 13 tandem repeats were detected in the *D. stramonium* cp genome. Most simple sequence repeats (SSR) are AT-rich and are less abundant in coding regions than in non-coding regions. Both SSRs and GC content were unevenly distributed in the entire cp genome. All preferred synonymous codons were found to use A/T ending codons. The difference in GC contents of entire genomes and of the three-codon positions suggests that the *D. stramonium* cp genome might possess different genomic organization, in part due to different mutational pressures. The five most divergent coding regions and four non-coding regions (*trnH-psbA*, *rps4-trnS*, *ndhD-ccsA*, and *ndhI-ndhG*) were identified using whole plastome alignment, which can be used to develop molecular markers for phylogenetics and barcoding studies within the Solanaceae. Phylogenetic analysis based on 68 protein-coding genes supported *Datura* as a sister to *Solanum*. This study provides valuable information for phylogenetic and cp genetic engineering studies of this poisonous and medicinal plant.

**Citation:** Yang Y, Yuanye D, Qing L, Jinjian L, Xiwen L, et al. (2014) Complete Chloroplast Genome Sequence of Poisonous and Medicinal Plant *Datura stramonium*: Organizations and Implications for Genetic Engineering. PLoS ONE 9(11): e110656. doi:10.1371/journal.pone.0110656

**Editor:** Zhong-Hua Chen, University of Western Sydney, Australia

**Received:** April 23, 2014; **Accepted:** September 24, 2014; **Published:** November 3, 2014

**Copyright:** © 2014 Yang et al. This is an open-access article distributed under the terms of the Creative Commons Attribution License, which permits unrestricted use, distribution, and reproduction in any medium, provided the original author and source are credited.

**Data Availability:** The authors confirm that all data underlying the findings are fully available without restriction. The *Datura stramonium* chloroplast genome file are available from the GenBank database (accession number NC\_018117). All genome files are available from the GenBank database (accession numbers: NC\_015113, NC\_008325, NC\_016430, NC\_006290, NC\_015621, NC\_010601, NC\_007977, NC\_015543, NC\_007578, NC\_010442, NC\_008535, NC\_016468, NC\_008407, NC\_013707, NC\_015604, NC\_015401, NC\_015623, NC\_015608, NC\_016433, NC\_004561, NC\_009808, NC\_007500, NC\_001879, NC\_007602, NC\_016068, NC\_007943, NC\_007898, NC\_008096, NC\_000932, NC\_014674, NC\_020318, NC\_016921, NC\_014697, NC\_020152, NC\_016730, NC\_016728, NC\_010093, NC\_009601, NC\_005973, NC\_013823, NC\_009618) and are listed in Table S1 of the manuscript.

**Funding:** This work was supported by Macau Science and Technology Development Fund (<http://www.fdc.gov.mo/>) (077/2011/A3, 074/2012/A3), Research committee of University of Macau ([http://www.umac.mo/research/research\\_committee.html](http://www.umac.mo/research/research_committee.html)) (MYRG208A (Y3-L4)-ICMS11-WYT, MRG012/WYT/2013/ICMS, MRG013/WYT/2013/ICMS) and the National Natural Science Foundation of China (81202860, 81303160). The funders had no role in study design, data collection and analysis, decision to publish, or preparation of the manuscript.

**Competing Interests:** The authors have declared that no competing interests exist.

\* Email: xiweijia2004@aliyun.com (LXW); ytwang@umac.mo (WYT)

† These authors contributed equally to this work.

## Introduction

Scopolamine is an important tropane alkaloid from Solanaceae plants widely used as anticholinergic agent that acts on the parasympathetic nervous system [1]. It is widely used as sedative in clinical practice including preanesthetic medication for general anesthesia, and also for manic psychosis, motion sickness, parkinsonism and organophosphorus pesticide poisoning [2,3]. Due to its activity in exciting the respiratory center and sedative effect on the cerebral cortex, scopolamine is used to rescue respiratory failure caused by extremely heavy epidemic encephalitis, accompanied by severe frequent tics in such condition [4,5]. Recently scopolamine also exhibited great potential as a drug for use in withdrawal for heroin addicts [6]. Scopolamine occurs in all plant organs and was traditionally extracted from flowers of *Datura* species. It was recently reported that the maximum

concentrations were found in the stems and leaves of juvenile plants [3,7]. But the concentration is still quite low and its supply cannot meet the market demand. Therefore significant attention has been paid to its commercial production using biotechnologies.

Over the last decades, engineering techniques have been intensively investigated as a possible tool for the production of scopolamine in different plant species that produce tropane alkaloids, including overexpression of genes involved in the biosynthesis of scopolamine [1,8,9] as well as biotransforming hyoscyamine into scopolamine in hairy root cultures [9–11]. However production was too low for commercialization. Because of the complicated metabolic pathway of biosynthesis, it has become clear that unorganized plant tissue cultures are frequently unable to produce scopolamine at the same levels as the intact plant [8].

Plastids of higher plant are cellular organelles with circular genomes of 120–160 kb in size present in 1,000–10,000 copies per cell [12], and are maternally inherited in most angiosperm plant species [13]. Chloroplast transformation offers a higher level expression of foreign genes in intact plant compared with hair root cultures. In the past two decades, more than forty transgenes have been stably integrated and expressed in the tobacco cp genome to confer important agronomic traits or produce commercial products including biomaterials and recombinant proteins [8]. Chloroplast engineering, either alone or in combination with traditional cultivation techniques, may provide the means to develop novel sources of plants to solve tropane alkaloid biosynthesis, the century old problem. Great progress has been made in the study of discovering rate-limiting enzymes in the key steps of catalysis for tropane alkaloids synthesis [1,10].

However the lack of plastid genome data available in public databases limits further studies of cp transformation. *Datura stramonium* has been one of the major plant sources for extracting scopolamine. It is a good model plant to study at the biochemical and molecular level. We here analyzed and characterized the cp genome of *D. stramonium*, providing the basic genetic information for cp engineering. Comparison of the genome structures with other plant species was also determined. These data should also contribute to a better understanding in future studies of evolution within the asteridae clade and species identification of this poisonous and medicinal plant.

## Materials and Methods

### Genome Sequencing Preparation

Chloroplast DNA (cp DNA) was extracted from approximately 100 g fresh young leaves of *Datura stramonium* using a sucrose gradient centrifugation method that was improved by Li *et al.* [14]. The concentration of the DNA for each cp genome was estimated by measuring A260 with an ND-2000 spectrometer (Nanodrop technologies, Wilmington, DE, USA), and visual approximation was performed using gel electrophoresis. Pure cpDNA was sequenced using a 454/Roche FLX high-throughput sequencing platform.

### Genome Assembly and Annotation

The Sff-file obtained was pre-processed, including the trimming of low-quality sequences. *De novo* assembly was performed using version 2.5 of the GS FLX system software. The position and direction of the contigs were identified using the cp genome sequence of *Nicotiana sylvestris* (NC\_007500) as the reference sequence. The boundaries of IR-LSC and IR-SSC were confirmed using PCR amplification. We used the online program DOGMA (Dual Organellar GenoMe Annotator) [15] to annotate the cp genome. The position of each gene was determined using a blast method with the complete cp genome sequence of *N. sylvestris* as a reference sequence. Minor revisions were performed according to the start and stop codons. The tRNA genes were identified using DOGMA and tRNAscan-SE [16]. The nomenclature of cp genes followed the ChloroplastDB [17]. The circular cp genome map was drawn by the OGDRAW program [18]. To analyze the characteristics of variations in synonymous codon usage by neglecting the influence of amino acid composition, the relative synonymous codon usage values (RSCU) were determined using MEGA5.2 [19]. The final cp genome of *Datura stramonium* has been deposited to GenBank (accession number NC\_018117).

## Genome Comparison and Sequence Analysis

The pairwise alignments of cp genomes were performed using MUMmer [20]. The mVISTA program in Shuffle-LAGAN mode [21] was used to compare the cp genome of *Datura stramonium* with three other cp genomes using the genome sequence of *Datura stramonium* as reference. We used DnaSP v5 [22] to calculate the substitution rates. Simple sequence repeats (SSRs) were detected using MISA (<http://pgrc.ipkgatersleben.de/misa/>), with thresholds of eight repeat units for mononucleotide SSRs, four repeat units for di- and trinucleotide SSRs and three repeat units for tetra-, penta- and hexanucleotide SSRs. All of the repeats found were manually verified, and the redundant results were removed. We investigated the distribution of SSRs located in LSC, SSC and IR regions. The proportions of different nucleotides (A, T, C, G) were calculated and different chloroplast SSR types (CSTs) found among SSRs were discovered. To determine the repeat structure, REPuter [23] was used to visualize both forward and palindrome repeats. The settings for the minimal repeat size was 30 bp and the identity of repeats was no less than 90% (hamming distance = 3). Low complexity and nested repeats were ignored. Tandem repeats were analyzed with the aid of Tandem Repeats Finder (TRF) v4.04 [24] and the parameters were set according to Nie *et al* [25].

## Phylogenetic Analysis

In order to identify the phylogenetic position of *Datura* within the asterid lineages, 42 complete cp genome sequences are downloaded from the Genbank of NCBI database (Table S1). Protein-coding gene sequences (Table S2) were aligned using the ClustalW2 algorithm [26]. Pairwise sequence divergences were calculated using Kimura two-parameter (K2P) model [27]. And 68 protein-coding genes (Table S2) shared by all studied plastid genomes were extracted for phylogenetic analysis. Each gene was aligned using the ClustalW and the alignment was edited manually. Maximum likelihood (ML) analysis was performed using RAxML v7.0 [28] using the GTR+I+G nucleotide substitution model under the best fit parameters determined by Modeltest ver. 3.7 [29]. Maximum Parsimony (MP) analysis was performed using PAUP ver. 4.0b10 [30] taking the cp genome sequence of *Cycas taitungensis* (NC\_009618) as the outgroup. MP searches included 1,000 replicates of random taxon addition and a heuristic search using tree bisection and reconnection (TBR) branch swapping (Multrees option in effect). Both of these analyses, we using 1000 bootstrap replicates.

## Result

### Genome Features

The complete cpDNA genome of *Datura stramonium* is 155,871 bp in length (GeneBank: NC\_018117) with a typical quadripartite structure of land plant cp genomes. The cp genome are divided into a LSC (86,302 bp) and a SSC (18,367 bp) regions separated by a pair of inverted repeat regions (IRa and IRb) of 25,602 bp (Table 1, Figure 1). The overall GC content of the whole cp genome sequence is 37.9% which is similar to those of the other reported asteridae cp genomes [31–35]. However the GC content is unevenly distributed in the entire cp genome. It is highest in the IR regions (43.1%), median in the LSC region (36.0%) and lowest in the SSC regions (32.3%).

The positions of all the genes identified in the *D. stramonium* cp genome and functional categorization of these genes are presented in Figure 1. This cp genome encodes 132 predicted functional genes, of which 113 genes are unique, including 80 protein-coding genes, 29 transfer RNA (tRNA) genes and four rRNAs (Table S3). In addition, seven tRNA, all rRNA and eight protein-coding genes

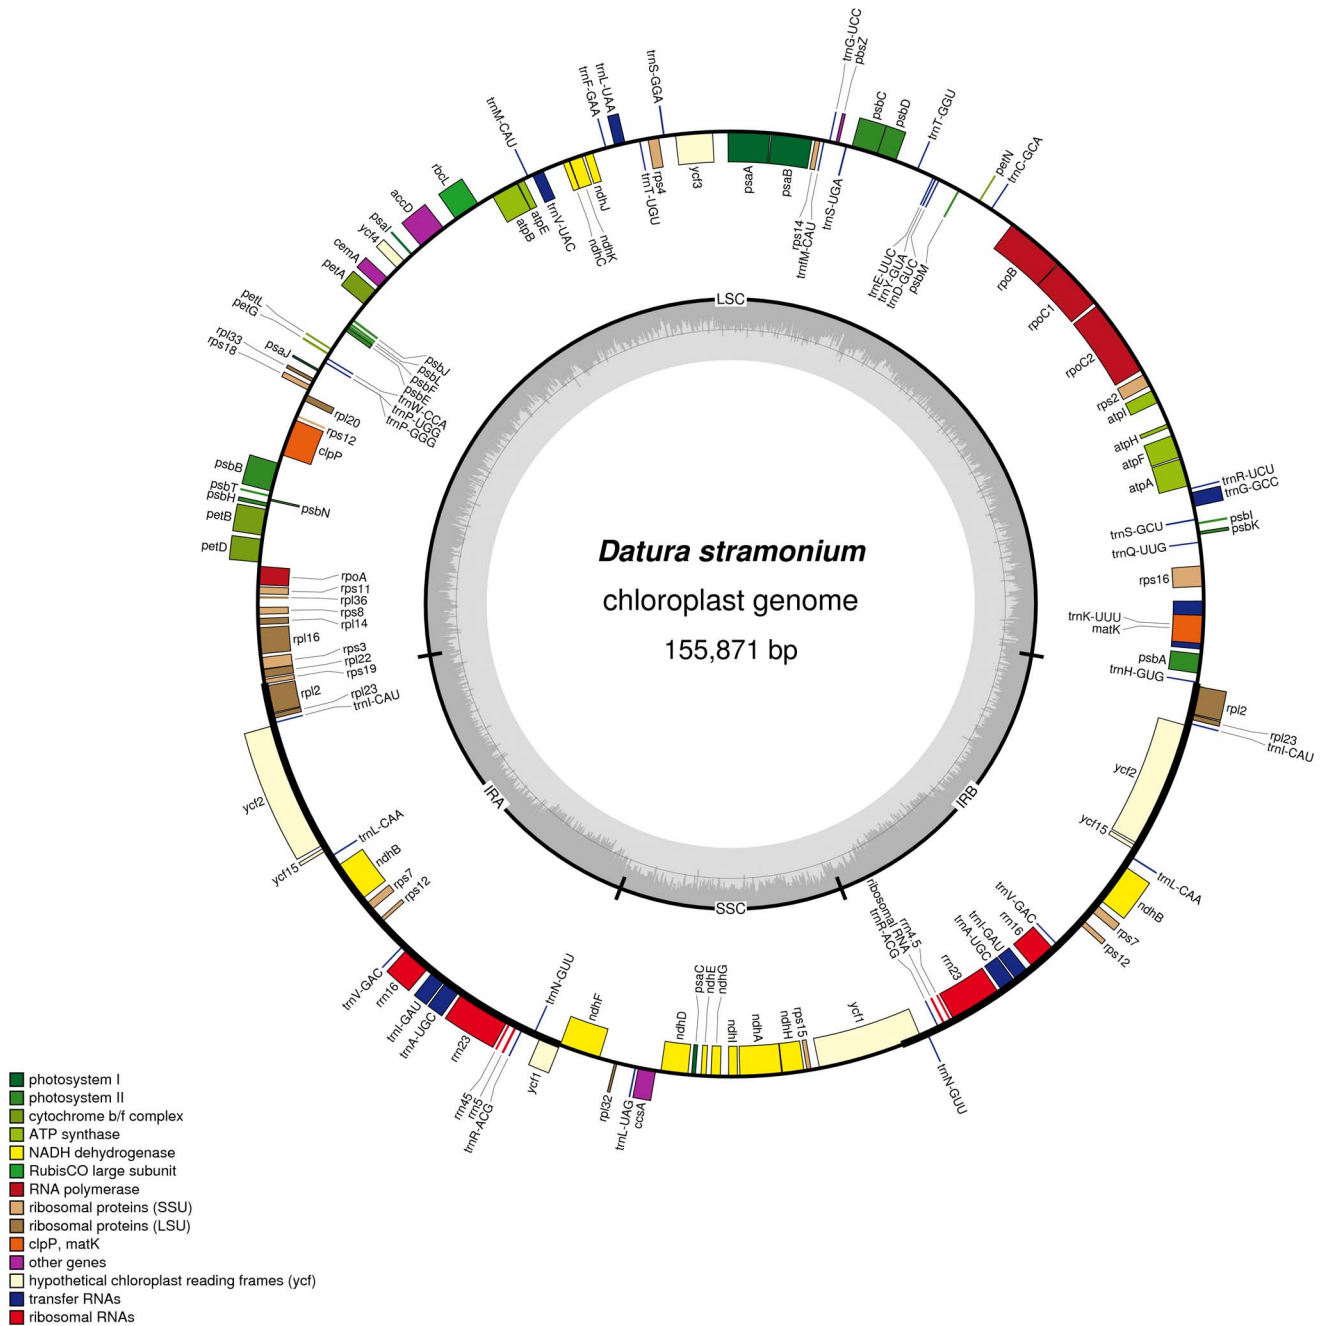

**Figure 1. Gene map of the *Datura stramonium* chloroplast genome.** Genes drawn inside the circle are transcribed clockwise, and those outside are counterclockwise. Genes belonging to different functional groups are color-coded. The darker gray in the inner circle corresponds to GC content, while the lighter gray corresponds to AT content.  
doi:10.1371/journal.pone.0110656.g001

are duplicated in the IR regions. The LSC region contains 62 protein-coding and 25 tRNA genes but one tRNA and 11 protein-coding genes in the SSC region. There are altogether 14 intron-containing genes, 11 (nine protein-coding and two tRNA genes) of which contain one intron and three (*rps12*, *clpP* and *ycf3*) of which contain two introns (Table S4). The *rps12* gene is trans-spliced and the 5' end located in the LSC region and the two duplicated 3' end are in the IR regions. The *ndhA* gene has the longest intron (1,155 bp).

Protein-coding regions accounted for 59.7% of the whole genome sequence, while rRNA and tRNA regions accounted for

4.5% and 5.8%, respectively. The remaining regions are non-coding sequences, including introns, intergenic spacers and pseudogenes. Moreover, the total length of all the 88 protein-coding genes is 80,316 bp and these genes comprise 26,772 codons. Frequency of codon usage was calculated in the *D. stramonium* cp genome, and summarized in Table 2. A total of 10.6% of all codons (2,848) encodes leucine, and 1.1% of which (305) encodes cysteine, which are the most and least prevalent amino acids, respectively. Within protein-coding sequences (CDS), the percentage of AT content of the first, second and third codon positions are 54.3%, 61.8% and 69.4%, respectively (Table 1).

**Table 1.** Base composition in the *Datura stramonium* chloroplast genome.

|              | T (U) (%) | C (%) | A (%) | G (%) | Length (bp) |
|--------------|-----------|-------|-------|-------|-------------|
| LSC          | 32.7      | 18.4  | 31.3  | 17.6  | 86,302      |
| SSC          | 34.0      | 16.8  | 33.7  | 15.5  | 18,367      |
| IRa          | 28.3      | 20.7  | 28.6  | 22.4  | 25,601      |
| IRb          | 28.6      | 22.4  | 28.3  | 20.7  | 25,601      |
| Total        | 31.5      | 19.2  | 30.6  | 18.6  | 155,871     |
| CDS          | 31.2      | 17.9  | 30.6  | 20.3  | 80,316      |
| 1st position | 23.7      | 18.9  | 30.6  | 26.8  | 26,772      |
| 2nd position | 32.5      | 20.3  | 29.3  | 17.9  | 26,772      |
| 3rd position | 37.6      | 14.3  | 31.8  | 16.3  | 26,772      |

doi:10.1371/journal.pone.0110656.t001

Such bias towards a higher AT representation at the third codon position was also observed in other land plant cp genomes [25,31,36,37]. There were 96.7% (29/30) of all the types of preferred synonymous codons (RSCU>1) ending with A or U and 90.6% (29/32) of non-preferred synonymous codons (RSCU <1) ending with G or C. In addition, A- and/or U-ending codons account for 69.3% of all codons within CDS. The usage of start codon (AUG) and UGG coding trp has no bias (RSCU = 1).

### SSR Analysis

The simple sequence repeats (SSR), also called microsatellites, are a group of tandem repeated sequences which consist of 1–6 nucleotide repeat units [38]. A total of 160 SSR loci were detected in *D. stramonium* cp genome including 109 mononucleotide, 40 dinucleotide, 3 trinucleotide and 8 tetranucleotide repeat units. However, only 53 loci were identified in 19 CDS. Among them, 5 genes were found to harbor at least two SSRs, including *atpA*, *yfc3*, *accD*, *rbcL* and *clpP*. We also detected perfect SSRs longer than 8 bp in *D. stramonium* together with 41 other cp genomes to determine whether there was any homology between the isolated SSR fragments and previously reported sequences (Figure 2). *Arabidopsis thaliana* had the maximum amount of SSRs (335) while the smallest number (127) occurred in *Oryza nivara*. Mononucleotide and dinucleotide repeat units are the prevalent types in all species, ranging from 91 (*Magnolia grandiflora*) to 234 (*Arabidopsis thaliana*) and 20 (*Oryza nivara*) to 85 (*Quercus rubra*) in quantity, respectively. The number of trinucleotides is slightly lower than that of tetranucleotides, and only rarely are pentanucleotides or hexanucleotides observed in these 41 cp genomes. Most of SSRs detected in these cp genomes were A (28.2%) and T (35.2%) mononucleotide SSRs while C or G repeats were rarely found. We also detected the distribution of SSRs in the CDS of studied cp genomes (Table S5). The CDS accounts for approximately 51% of the total length, whereas the SSR proportion ranges from 19% to 41%. Average total number of SSRs identified in CDS is 56 accounting for 30% of all SSRs in these whole cp genomes. In addition, the majority of SSRs are located in LSC region (63.2–66.9%) in 10 Solanales cp genomes.

### Repeat Analysis

For the repeat structure analysis, there are 33 large repeats of 30 bp or larger in *Datura stramonium* cp genome (Table 3). Eleven forward, nine palindromic and thirteen tandem repeats were identified. There are three repeat motifs detected in the CDS of *yfc2* gene and the IGS (*rps12.trnV-GAC*). In 11 repeats there were two repeat motifs while in other 20 repeats only one motif

was found (Table 3). Most repeats are located in the intergenic or intronic regions, while some of them are in protein-coding regions. Most of the repeats exhibit lengths between 30 and 60 bp, while the two longest repeats respectively occurred in *rrn4.5-rrn5* (66 bp) and IGS (*rps12.trnV-GAC*). Eight forward, six palindromic and eight tandem repeats were distributed in the LSC region.

### Comparison with Other cp Genomes in the Solanales Order

There are currently ten complete cp genome sequences in the Solanales order available in genbank. The gene order and organization of *Datura* are almost identical to those of *N. tabacum* (NC\_001879) and other species. The average size of the Solanales cp genomes is 156,422 bp in length. *Ipomoea purpurea* has the largest genome size that is approximately 6.2 kb larger than that of *D. stramonium*, which is mainly attributed to the difference in the length of the IR regions. The genome size of *S. tuberosum* is smallest and is approximately 575 bp smaller than that of *D. stramonium*. This variation in sequence length is mainly caused by the divergence in the length of the LSC region (Table S6). We compared four cp genomes from four different genera in Solanales and observed approximately identical gene order and organization among them (Figure 3). The overall sequence identity of the four cp genomes was plotted using *D. stramonium* as reference. The average sequence divergence of coding regions in *Ipomoea purpurea* is 1.47%, while 1.06% and 1.09% in *Nicotiana undulate* and *Solanum tuberosum*, respectively (Table S7). This study found that the ten most divergent coding regions were *yfc1*, *clpP*, *cemA*, *accD*, *rpl32*, *rpl22*, *matK*, *ccsA*, *ndhF* and *rpl36* based on the p-distance measurements. These genes are mainly located in single copy regions. In addition, sequences in non-coding regions exhibit a higher divergence than those in coding regions and the most divergent regions localize in the intergenic spacers among the four cp genomes. In our alignment, these highly divergent regions included *trnH-psbA*, *rps4-trnS*, *ndhD-ccsA* and *ndhI-ndhG*.

The non-synonymous (Ka) to synonymous (Ks) rate ratio (denoted by Ka/Ks) among *Datura*, *Ipomoea*, *Nicotiana* and *Solanum* was calculated and is shown in Figure 4. In IRs region, the Ka/Ks ratio of different genes was all lower than that in the SSC and LSC regions. In four species, most of the ratios of genes were below 1.0, except the value of *atpA*, *rpoC2*. The Ka/Ks values of *atpA*, *rpoC2* and *psbC* (except in *Nicotiana undulate*) among four species are all over 1.0, which means the positive selection was exerting an influence on these genes in the evolution of Solanoideae. In contrast, ratios in gene of *Datura stramonium* were variable from 0 to 0.99 (exclude *ndhD*, 1.54), indicating these

**Table 2.** The codon–anticodon recognition pattern and relative synonymous codon usage (RSCU) for the *Datura stramonium* chloroplast genome.

| Amino acid | Codon | Count | RSCU | tRNA        |
|------------|-------|-------|------|-------------|
| Phe        | UUU   | 955   | 1.27 |             |
| Phe        | UUC   | 551   | 0.73 | trnF-GAA    |
| Leu        | UUA   | 875   | 1.84 | trnL-UAA    |
| Leu        | UUG   | 579   | 1.22 | trnL-CAA    |
| Leu        | CUU   | 612   | 1.29 |             |
| Leu        | CUC   | 207   | 0.44 |             |
| Leu        | CUA   | 378   | 0.80 | trnL-UAG    |
| Leu        | CUG   | 197   | 0.42 |             |
| Ile        | AUU   | 1105  | 1.47 |             |
| Ile        | AUC   | 461   | 0.61 | trnI-GAU    |
| Ile        | AUA   | 684   | 0.91 | trnI-CAU    |
| Met        | AUG   | 622   | 1.00 | trn(f)M-CAU |
| Val        | GUU   | 526   | 1.46 |             |
| Val        | GUC   | 182   | 0.50 | trnV-GAC    |
| Val        | GUA   | 539   | 1.46 | trnV-UAC    |
| Val        | GUG   | 197   | 0.55 |             |
| Ser        | UCU   | 591   | 1.70 |             |
| Ser        | UCC   | 341   | 0.98 | trnS-GGA    |
| Ser        | UCA   | 407   | 1.17 | trnS-UGA    |
| Ser        | UCG   | 210   | 0.60 |             |
| Pro        | CCU   | 428   | 1.52 |             |
| Pro        | CCC   | 206   | 0.73 | trnP-GGG    |
| Pro        | CCA   | 334   | 1.18 | trnP-UGG    |
| Pro        | CCG   | 162   | 0.57 |             |
| Thr        | ACU   | 540   | 1.58 |             |
| Thr        | ACC   | 267   | 0.78 | trnT-GGU    |
| Thr        | ACA   | 410   | 1.20 | trnT-UGU    |
| Thr        | ACG   | 148   | 0.43 |             |
| Ala        | GCU   | 616   | 1.75 |             |
| Ala        | GCC   | 245   | 0.70 |             |
| Ala        | GCA   | 400   | 1.14 | trnA-UGC    |
| Ala        | GCG   | 143   | 0.41 |             |
| Tyr        | UAU   | 783   | 1.60 |             |
| Tyr        | UAC   | 198   | 0.40 | trnY-GUA    |
| Stop       | UAA   | 44    | 1.52 |             |
| Stop       | UAG   | 25    | 0.86 |             |
| His        | CAU   | 482   | 1.53 |             |
| His        | CAC   | 147   | 0.47 | trnH-GUG    |
| Gln        | CAA   | 705   | 1.49 | trnQ-UUG    |
| Gln        | CAG   | 244   | 0.51 |             |
| Asn        | AAU   | 1003  | 1.52 |             |
| Asn        | AAC   | 317   | 0.48 | trnN-GUU    |
| Lys        | AAA   | 1052  | 1.48 | trnK-UUU    |
| Lys        | AAG   | 371   | 0.52 |             |
| Asp        | GAU   | 860   | 1.60 |             |
| Asp        | GAC   | 217   | 0.40 | trnD-GUC    |
| Glu        | GAA   | 1036  | 1.47 | trnE-UUC    |
| Glu        | GAG   | 370   | 0.53 |             |
| Cys        | UGU   | 223   | 1.46 |             |

**Table 2. Cont.**

| Amino acid | Codon | Count | RSCU | tRNA     |
|------------|-------|-------|------|----------|
| Cys        | UGC   | 82    | 0.54 | trnC-GCA |
| Stop       | UGA   | 18    | 0.62 |          |
| Trp        | UGG   | 475   | 1.00 | trnW-CCA |
| Arg        | CGU   | 341   | 1.26 | trnR-ACG |
| Arg        | CGC   | 100   | 0.37 |          |
| Arg        | CGA   | 394   | 1.46 |          |
| Arg        | CGG   | 126   | 0.47 |          |
| Arg        | AGA   | 487   | 1.80 | trnR-UCU |
| Arg        | AGG   | 174   | 0.64 |          |
| Ser        | AGU   | 420   | 1.21 |          |
| Ser        | AGC   | 119   | 0.34 | trnS-GCU |
| Gly        | GGU   | 578   | 1.26 |          |
| Gly        | GGC   | 199   | 0.43 | trnG-GCC |
| Gly        | GGA   | 740   | 1.61 | trnG-UCC |
| Gly        | GGG   | 324   | 0.70 |          |

doi:10.1371/journal.pone.0110656.t002

gene may have already been under purify selection prior to the evolution between *D. stramonium* and *N. tabacum*. *Nicotiana undulate* was relatively closest to the reference species *Nicotiana tabacum* among all four species. The Ka/Ks ratio was 0 in 45 of 62 compared gene, which displayed that the rate of synonymous and non-synonymous was not existed among *N. undulate* and *N. tabacum*. The evolution in species level of Solanoideae is highly conservative.

Variation between the coding sequences of *D. stramonium* and *Ipomoea purpurea*, *Nicotiana undulate* or *Solanum tuberosum* was also analyzed by comparing each individual gene as well as the overall sequences (Table S7). The four rRNA genes are the most conserved, while the most divergent coding regions are *accD*, *cemA*, *psbT*, *clpP*, and *yef1*.

## IR Contraction and Expansion

The size variation of angiosperm cp genomes is primarily due to expansion and contraction of the IR region and the single copy (SC) boundary regions. Detailed comparison at the junction of the IR/SC boundaries among *Atropa belladonna*, *Nicotiana tomentosiformis*, *Nicotiana tabacum*, *Solanum bulbocastanum*, *Solanum lycopersicum*, *Datura stramonium* was presented in Figure 5. Despite the similar length of the IR regions in the six species, from 25,342 bp to 25,906 bp, some IR expansions and contractions were observed. *Rps19* and *yef1* pseudogenes of various lengths were located at the IRb/LSC and IRb/SSC boundaries, respectively. The border of IRb-LSC junction was located within the *rps19* gene in these cp genomes except in *N. tabacum*, resulting in the formation of the *rps19* pseudogenes. In *D.*

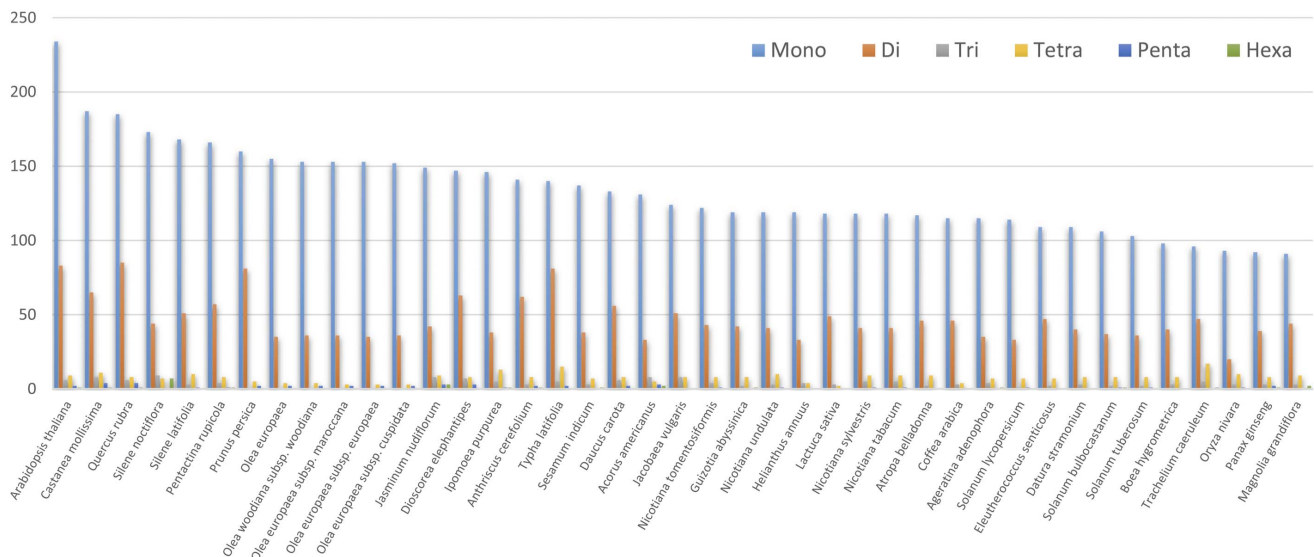**Figure 2. Distribution of SSRs present in the 41 asteridae chloroplast genomes.**

doi:10.1371/journal.pone.0110656.g002

**Table 3.** Repeated sequences in the *Datura stramonium* chloroplast genome.

| Repeat number | Size (bp) | Type | Location                                                                 | Repeat Unit                                               | Region   |
|---------------|-----------|------|--------------------------------------------------------------------------|-----------------------------------------------------------|----------|
| 1             | 50        | F    | <i>psaB</i> (CDS), <i>psaA</i> (CDS)                                     | GAGAAAAATAAATGCAATAGCTAAATGGTGATGGGCAATATCAGTCAGCC        | LSC      |
| 2             | 39        | F    | <i>ycf3</i> (intron), IGS ( <i>rps12</i> , <i>trnV-GAC</i> )             | CCAGAACCGTACGTGAGATTTTACCTCATAACGGCTCCT                   | LSC, IRa |
| 3             | 39        | F    | <i>ycf3</i> (intron), <i>ndhA</i> (intron)                               | ACAGAACTGTACGTGAGATTTTACCTCATAACGGCTCCT                   | LSC, SSC |
| 4             | 39        | F    | IGS ( <i>rps12</i> , <i>trnV-GAC</i> ), <i>ndhA</i> (intron)             | TCAGAACCGTACATGAGATTTTACCTCATAACGGCTCCT                   | IRa, SSC |
| 5             | 40        | F    | <i>trnF-GAA</i>                                                          | TCAGAGGACTGAAAATCTCGTGTACCCTCCAAATCTG                     | LSC      |
| 6             | 34        | F    | IGS ( <i>rrn4.5</i> , <i>rrn5</i> )                                      | TCATTGTTCAAATCTTTGACAACACGAAAAAAC                         | SSC      |
| 7             | 35        | F    | <i>ycf2</i> (CDS)                                                        | AATATTGATGATAGTGACGATATTGATGATAGTGA                       | IRa      |
| 8             | 30        | F    | <i>ycf3</i> (intron), IGS ( <i>rps12</i> , <i>trnV-GAC</i> )             | GTGAGATTTTACCTCATAACGGCTCCTCCC                            | LSC, IRa |
| 9             | 31        | F    | <i>trnS-GCU</i> , <i>trnS-UGA</i>                                        | CAACGGAAAGAGAGGGATTGCAACCTCGGT                            | LSC      |
| 10            | 31        | F    | <i>trnG-GCC</i> , <i>trnG-UCC</i>                                        | CGATGCGGGTTCGATTCCTCCCTACCCGCTCT                          | LSC      |
| 11            | 31        | F    | IGS ( <i>psbC</i> , <i>trnS-UGA</i> ), <i>clpP</i> (intron)              | CTTTTTCTTTTTGTTTTCAACTCATTTTA                             | LSC      |
| 12            | 56        | P    | <i>petD</i> (intron)                                                     | GTATAAGTGAAGTACTAGATAAACCGAATCTTGATTCCGTTTTTACTAGTTCATTAT | LSC      |
| 13            | 48        | P    | IGS ( <i>psbT</i> , <i>psbN</i> )                                        | CAGTTGAAGTACTGAGCTCCCGATATCGGGAGGCTCAGTACTTCAAC           | LSC      |
| 14            | 39        | P    | <i>ycf3</i> (intron), IGS ( <i>trnV-GAC</i> , <i>rps12</i> )             | CCAGAACCGTACGTGAGATTTTACCTCATAACGGCTCCT                   | LSC, IRb |
| 15            | 39        | P    | <i>ndhA</i> (intron), IGS ( <i>trnV-GAC</i> , <i>rps12</i> )             | ACAGAACTGTACGTGAGATTTTACCTCATAACGGCTCCT                   | SSC, IRb |
| 16            | 30        | P    | <i>trnS-GCU</i> , <i>trnS-GGA</i>                                        | AACGAAAGAGAGGGATTGCAACCTCGGT                              | LSC      |
| 17            | 34        | P    | IGS ( <i>rrn4.5</i> , <i>rrn5</i> ), IGS ( <i>rrn5</i> , <i>rrn4.5</i> ) | TCATTGTTCAAATCTTTGACAACACGAAAAAAC                         | IRa, IRb |
| 18            | 35        | P    | <i>ycf2</i> (CDS)                                                        | AATATTGATGATAGTGACGATATTGATGATAGTGA                       | IRa, IRb |
| 19            | 32        | P    | IGS ( <i>trnE-UUC</i> , <i>trnT-GGU</i> )                                | CTTTTTTATTTAGAAAATTTGTAATAAAAAA                           | LSC      |
| 20            | 30        | P    | <i>trnS-UGA</i> , <i>trnS-GGA</i>                                        | AAAGGAGAGAGAGGGATTGCAACCTCGAT                             | LSC      |
| 21            | 44        | T    | IGS ( <i>trnK-UUU</i> , <i>rps16</i> )                                   | CTACTTAATTTAAAAATTTAAAA (*2)                              | LSC      |
| 22            | 40        | T    | IGS ( <i>atpH</i> , <i>atpI</i> )                                        | TTATTCATTTTATTATTAT (*2)                                  | LSC      |
| 23            | 33        | T    | IGS ( <i>rps2</i> , <i>rpoC2</i> )                                       | CATTATTCCTTTCTATT (*2)                                    | LSC      |
| 24            | 45        | T    | IGS ( <i>trnT-GGU</i> , <i>psbD</i> )                                    | ATTAATTCATCTATATTATATA (*2)                               | LSC      |
| 25            | 35        | T    | IGS ( <i>trnT-UGU</i> , <i>trnL-UAA</i> )                                | TTCTATATTGGATTCTA (*2)                                    | LSC      |
| 26            | 50        | T    | IGS ( <i>trnP-GGG</i> , <i>psaI</i> )                                    | ATTATATAGAAAATACTTATATACA (*2)                            | LSC      |
| 27            | 41        | T    | <i>rps18</i> (CDS)                                                       | TAAATCCAAGCGACCTTTCT (*2)                                 | LSC      |
| 28            | 47        | T    | <i>clpP</i> (intron)                                                     | GATAAAGCAAAGAGAAAAAGAA (*2)                               | LSC      |
| 29            | 58        | T    | <i>ycf2</i> (CDS)                                                        | ATATTGATGATAGTGACG (*3)                                   | IRa      |
| 30            | 62        | T    | IGS ( <i>rps12</i> , <i>trnV-GAC</i> )                                   | TATTATATTAGTATTTCTATT (*3)                                | IRa      |
| 31            | 66        | T    | IGS ( <i>rrn4.5</i> , <i>rrn5</i> )                                      | CATTGTTCAAATCTTTGACAACACGAAAAAAC (*2)                     | IRa      |
| 32            | 39        | T    | <i>ndhF</i> (CDS)                                                        | AATAAAAAACCTAAAATTCCT (*2)                                | SSC      |
| 33            | 55        | T    | <i>ycf1</i> (CDS)                                                        | TTCCTTTCTTTGATTCTCCTCTTTTT (*2)                           | SSC      |

\*copy number.

'F' is forward, 'P' is palindromic, and 'T' is Tandem; IGS: Intergenic spacer; CDS: protein-coding regions.

doi:10.1371/journal.pone.0110656.t003

*stramonium*, a short *rps19* pseudogene of 60 bp was created at the IRa-LSC border. The same pseudogene was 60 bp in *A. belladonna* and *N. tomentosiformis*, 39 bp in *S. bulbocastanum* and 88 bp in *S. lycopersicum*, respectively. The IRb-SSC border extended into the *ycf1* genes to create long *ycf1* pseudogenes in all of the cp genomes except in *Solanum bulbocastanum* where the IRb-SSC border expanded to duplicate a part of *ndhF* gene. The length of *ycf1* pseudogene was 1,469 bp in *A. belladonna*, 1,016 bp in *N. tomentosiformis*, 1,052 bp in *N. tabacum*, 1,117 bp in *S. bulbocastanum*, 1,139 bp in *Solanum lycopersicum* and 1,118 bp in *D. stramonium*. In *N. tabacum*, *S. lycopersicum* and *D. stramonium* cp genomes, the *ycf1* pseudogene and the *ndhF* gene overlapped by 11 bp, 3 bp and 20 bp, respectively. The IRa-SSC border was located within the CDS of *ycf1* gene and the length of the part of this gene in IR region was significantly

different among the six cp genomes. The *trnH* gene was all located in the LSC regions and has 3–6 bp apart from the IRa-LSC border.

### Phylogenetic Analysis

Phylogenetic analysis was performed on a 42-taxon 68-gene data matrix using MP and ML methods. The sequence alignment data comprised 41,127 characters after the gaps were excluded to avoid alignment ambiguities due to length variation. The MP analysis resulted in a single most-parsimonious tree (Figure S1) with a consistency index (CI) of 0.53 (excluding uninformative characters) and a retention index (RI) of 0.68. Bootstrap analysis showed that 36 of the 40 nodes were supported by values  $\geq 70\%$ , and all of the nodes had a bootstrap value  $>50\%$ . The ML analyses, using a single model for all of the genes (GTR +G+I),

produced a single tree (Figure 6) with  $-\ln L$  (unconstrained) = 356757.56. The ML bootstrap values were also high, with values of  $\geq 90\%$  for 31 of the 39 nodes and only one support value  $< 70\%$ . ML and MP trees exhibited the same topology within asteridae lineage and phylogenetic position of *Datura* was found between *Solanum* and *Atropa* in this study.

**Discussion**

**Comparative Analysis of the cp Genome Organization**

*Datura stramonium*, also known as jimson weed, devil weed or thorn apple, has been used for mystic and religious purposes as a mystical sacrament which brings about powerful visions and opens the user to communication with spirit world [39]. Especially *D. stramonium* had a long history of medicinal use in Asian countries since two thousand years ago. During the Three Kingdom Period (220–265 A.D.), its use as the first anesthetic for surgery was recorded in literatures [40]. Modern studies showed that *D. stramonium* had varieties of pharmacological effects including antiasthmatic [41], antiepileptic [42], antioxidant [43], antimicro-

bial [44,45], antifungal [46] and anti-inflammatory [47] activities. Approximately 400 complete cp genome sequences have been sequenced in GenBank. However most of these sequences are focused on economically important plants, such as *Solanum lycopersicum*, *Oryza sativa* and *Nicotiana tabacum*. In contrast, only few cp genome sequences have been reported for medicinal purposes such as *Salvia miltiorrhiza* and *Panax ginseng*, and still no cp genome sequences have been reported for *Datura*. The availability of the complete cp DNA sequences from *D. stramonium* provides us an improved evolutionary understanding of the chloroplast genome itself and it can also serve as a medicinal improvement tool. The *D. stramonium* cp genome has a typical angiosperm organization with a pair of IRs separating the LSC and SSC regions and exhibits identical gene order and content to the sequenced Solanales cp genomes [48], emphasizing the highly conserved nature of these land plant cp genomes [49]. The cp genome of *D. stramonium* has no significant difference compared with other Solanales genomes except *Ipomoea purpurea* (162,046 bp, Table S6). The GC content could be one of the most important factors in the evolution of genomic structures [50].

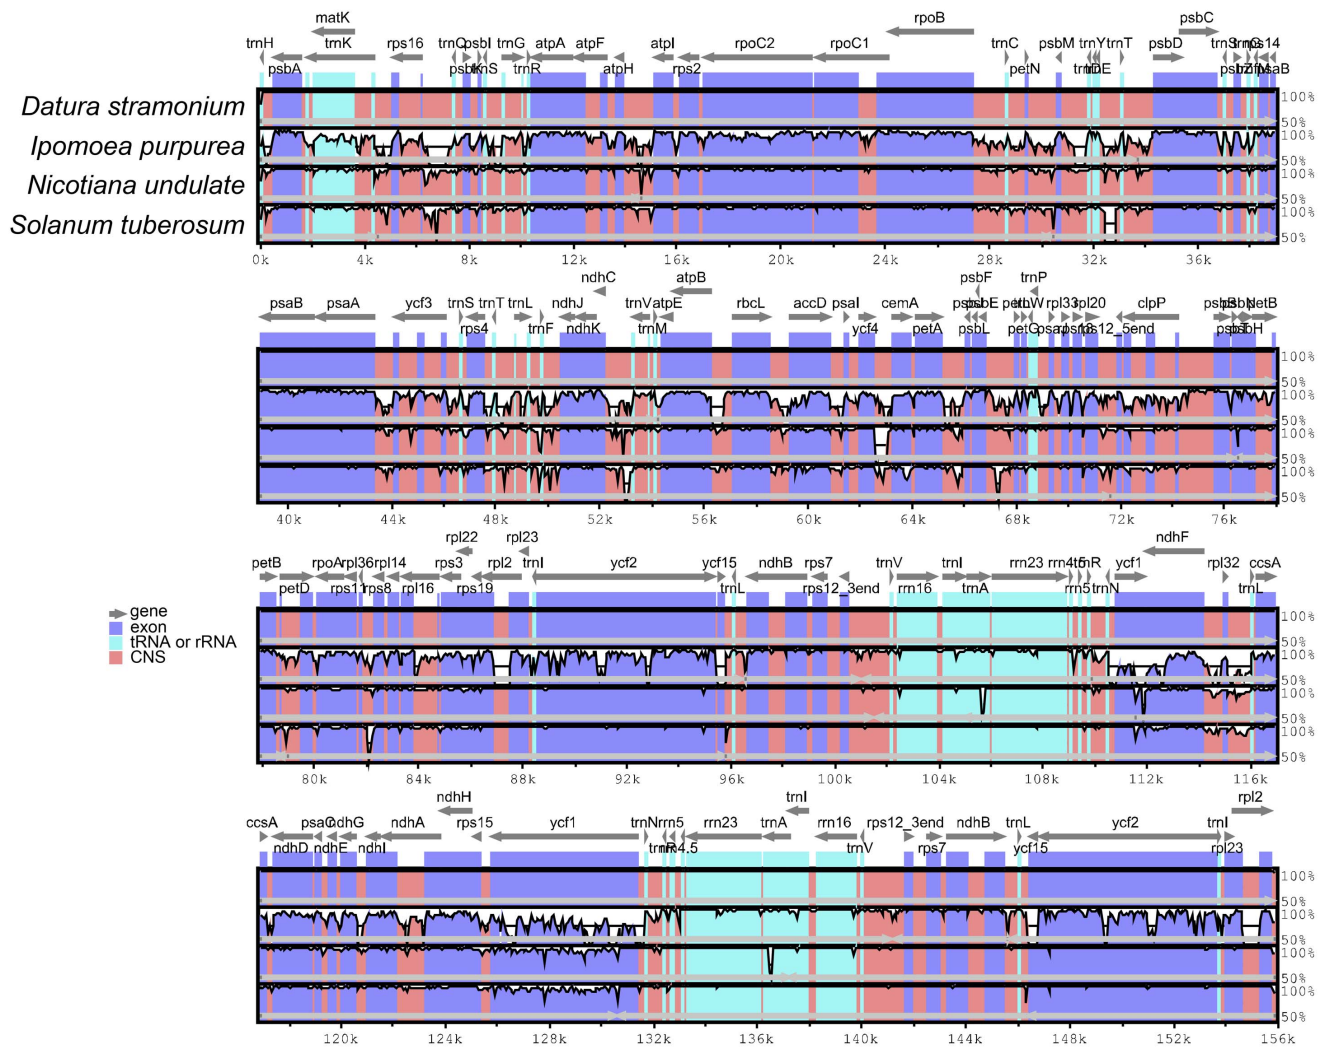

**Figure 3. Comparison of four chloroplast genomes using mVISTA program.** Grey arrows and thick black lines above the alignment indicate genes with their orientation and the position of the IRs, respectively. A cut-off of 70% identity was used for the plots, and the Y-scale represents the percent identity between 50–100%. Genome regions are color-coded as protein-coding (exon), rRNA, tRNA and conserved noncoding sequences (CNS).

doi:10.1371/journal.pone.0110656.g003



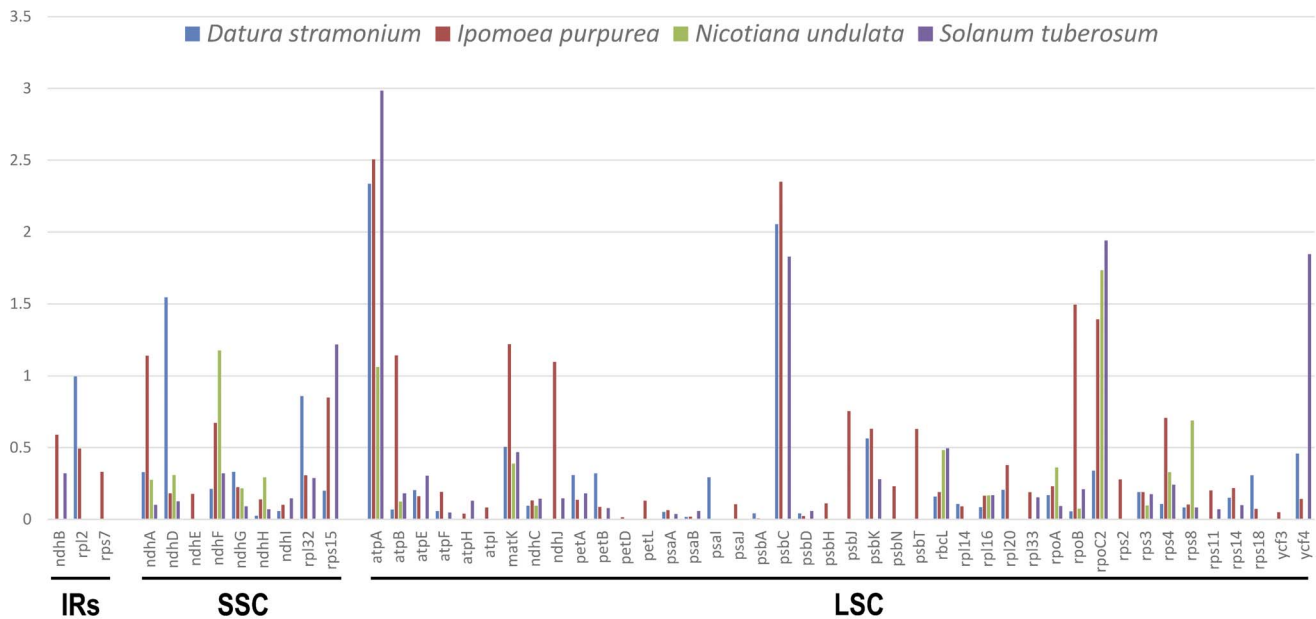

**Figure 4. The Ka/Ks ratio of *Datura stramonium*, *Ipomoea purpurea*, *Nicotiana undulata* and *Solanum tuberosum* for comparison with *Nicotiana tabacum*.**

doi:10.1371/journal.pone.0110656.g004

We found that the GC content was unevenly distributed in the entire cp genome of *D. stramonium* and the divergence of conserved nature between IR and SC regions might be partly due to the different GC content. In addition, the *ycf15* gene was completely annotated in *D. stramonium* cp genome while most recent studies supported the conclusion that *ycf15* is not a functional gene in protein-coding process [51–53].

In the universal genetic code, codons mainly differ at the third position. Though many synonymous codons needed to regulate the translation process, but only particular codons are preferred. Results in this study showed that the synonymous codons usage was not at the same frequencies and the patterns of synonymous codon usage also varied significantly among genes, which were consistent with previous investigations [54]. Codon bias of cp genes has been reported to be towards codons ended with A or T due to the compositional bias towards AT rich content [55,56]. Since all cp genomes have high AT content, AT biased mutational pressure is believed to be the factor responsible for codon usage bias. Previous studies demonstrated that there existed a significant relationship between codon usage bias and gene expression level [57,58], which suggested stronger natural selection constraints on highly expressed genes to optimize translation efficiency using major codons [59]. Information about the rare and preferred codons can be effectively used for enhancing gene expression by optimizing synonymous codons, which may provide us a further understanding of synthesis and metabolism of secondary metabolites in *D. stramonium*.

The intron plays an important role in the regulation of gene expression. Some recent studies have found that many introns improve exogenous gene expression at specific positions and times, resulting in the expected agronomic characters. Therefore, introns can be a useful tool to improve transformation efficiency [60]. A total of 14 intron-containing genes were detected and 11 of which contain one intron but 3 of which have two introns, which are similar to the cp genome of *Nicotiana tabacum*. These results are helpful for further transformation studies in *D. stramonium*.

Cp SSRs have frequently been used in species identification and genetic analysis at individual or group levels because of their high reproductivity, codominant inheritance, relatively high polymorphism, and relative abundance in genomes. There are altogether 160 cp SSRs discovered in *D. stramonium* cp genome. These markers will allow us to improve our understanding of the population structure and genetic diversity of this species that are essential for molecular breeding and cp genetic engineering. In this study, we also investigated the distribution of SSR in 41 cp genomes of Asteridae. The average number of SSRs in the CDS regions accounted for 30% of all discovered SSRs and the average SSR proportion located in LSC regions was 64.95% in these studied cp genomes. This result indicates that SSRs are less abundant in CDS than in non-coding regions and that they are unevenly distributed within Lamiales cp genomes, which provides more information for choosing effective molecular markers and detecting both intra- and interspecific polymorphisms within this order [61,62]. In addition, mononucleotide, dinucleotide, and trinucleotide repeats were composed of A or T at a higher level. This may contribute to a bias in base composition, which was consistent with the overall A-T richness (62.3%) of the Asteridae cp genome. The bias may have a close relationship with the easier changes to A-T rather than G-C in the genome [63]. An interesting finding was that the first seven SSR loci with largest number of mononucleotide repeat were distributed in Fagales, Rosales, Caryophyllales and Brassicales, and the four groups were closely related within asteridae and formed into a clade in maximum parsimony tree in this study.

In the analysis of repeat structure, 11 forward, 9 palindromic and 13 tandem repeats were revealed. Among these repeats, 72.7% of all forward repeats were distributed in the LSC region, 66.7% and 61.5% in palindromic and tandem repeats, respectively. In addition, most of all repeats are discovered located in the intergenic spacers or introns (Table 3). Short dispersed repeats are considered to be one of the major factors promoting cp genome rearrangements [64]. It was demonstrated that there existed a correlation between the abundance of short dispersed repeats and

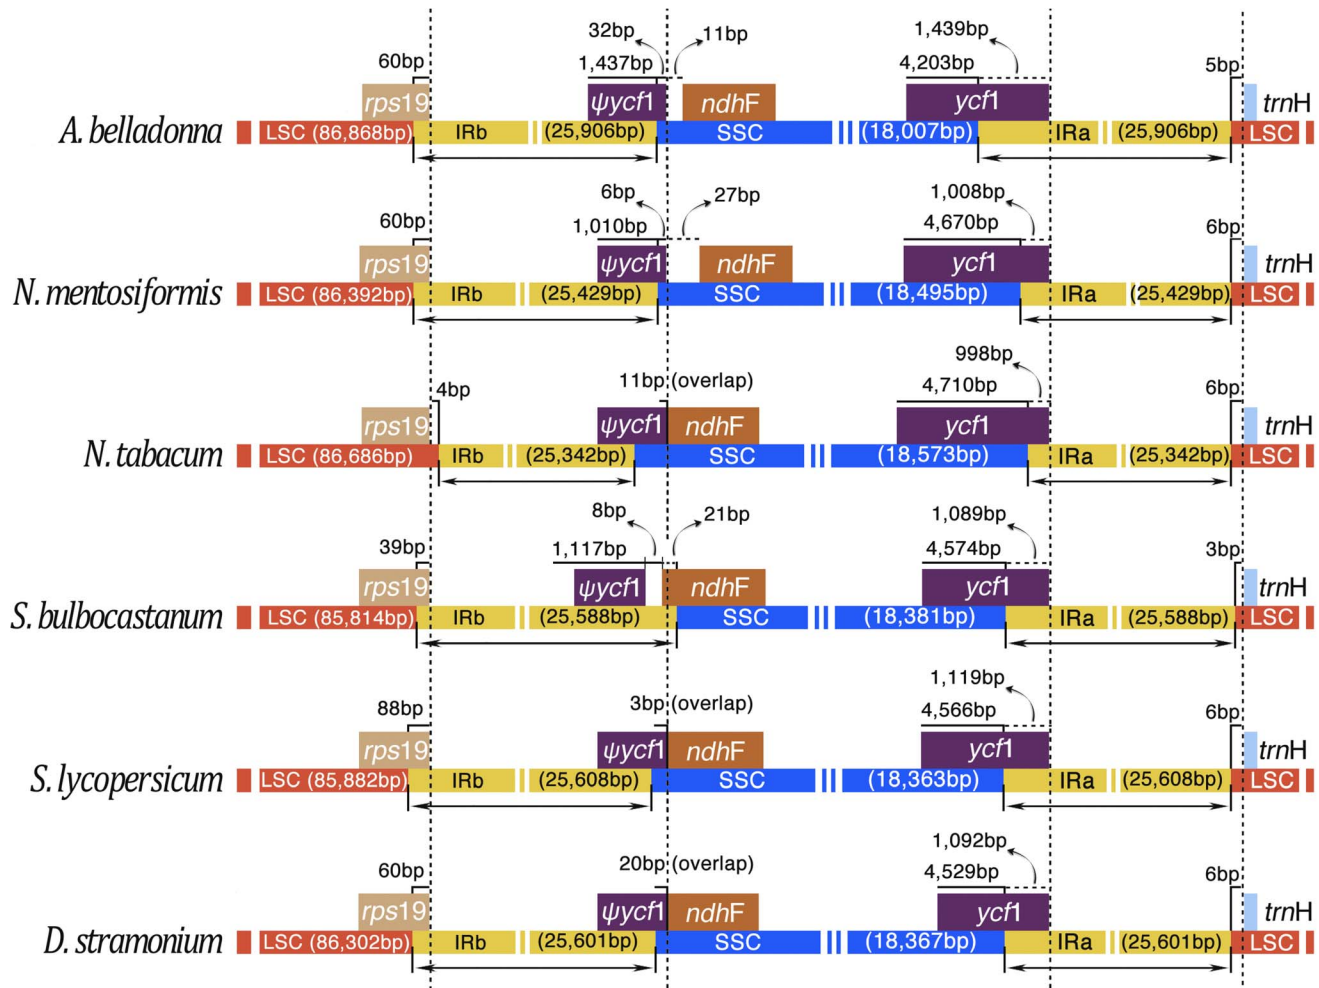

**Figure 5. Comparison of the borders of LSC, SSC and IR regions among six chloroplast genomes.** The IRb/SSC border extended into the *ycf1* genes to create various lengths of *ycf1* pseudogenes among six chloroplast genomes. The *ycf1* pseudogene and the *ndhF* gene overlapped in the *N. tabacum*, *S. lycopersicum* and *D. stramonium* cp genomes from 3 bp to 20 bp, respectively. Various lengths of *rps19* pseudogenes were created at the IRa/LSC borders except *N. tabacum*. This figure is not to scale. doi:10.1371/journal.pone.0110656.g005

the extent of gene rearrangements [65]. Most of these repeats always occur near the rearrangements hotspots and may mediate these regions [66,67]. In addition, short repeat motifs may facilitate inter-molecular recombination and create diversity of chloroplast genomes in a population [68]. Therefore repeats found in this study provide valuable information for phylogeny of *Datura* and population studies of *D. stramonium*.

Differences in cp genome size are mainly caused by the contraction and expansion of the IR regions [63,69]. However comparison of the IR boundary among six Solanaceae species showed that the size of the IR regions has no significant relationship with the length of the complete cp genome sequence (Figure 5). Correlation analysis indicated that the length of the IR regions had a positive correlation with that of *ycf1* gene located in IR region ( $R^2 = 0.9$ ,  $P < 0.05$ ). All *trnH* genes in the six Solanaceae species were found located in LSC region whereas this gene was completely located in the IR region in monocot cp genomes [70]. We also compared four Solanales cp genomes using mVISTA and observed an approximately identical gene order and organization among them (Figure 3). The comparison demonstrates that the two IR regions are less divergent than the LSC and SSC regions. The five most divergent coding regions are *accD*, *cemA*, *psbT*, *clpP*

and *ycf1*. The *ycf1* gene is considered as the most variable locus with unknown function in recent study, and is confirmed that it was more variable than the *matK* gene in the Orchidaceae [71]. The *ψycf1* (pseudogenes) located in the IRb region is conservative while the *ycf1* located in the SSC with highly variable. Dong *et al* used the two regions of *ycf1* (*ycf1*-a and *ycf1*-b) as a new tool to solve the phylogenetic problems at species level and for DNA barcoding of some closely related flowering plant species because of their high variability [72]. In addition, non-coding regions exhibit a higher divergence than coding regions and the most divergent regions localize in the intergenic spacers. These highly divergent regions including *trnH-psbA*, *rps4-trnS*, *ndhD-ccsA* and *ndhI-ndhG* can be used to develop markers or specific barcodes [73] that would maximize the ability to differentiate species within the Solanales. Data analysis concerning sequence divergence (Table S7) and Ka/Ks ratio (Figure 4) also supported that the IR regions are more conserved compared with SSC and LSC regions.

#### Phylogenetic Implications

Chloroplast genomes have shown a substantial power in studies of phylogenetics, evolution and molecular systematics. During the

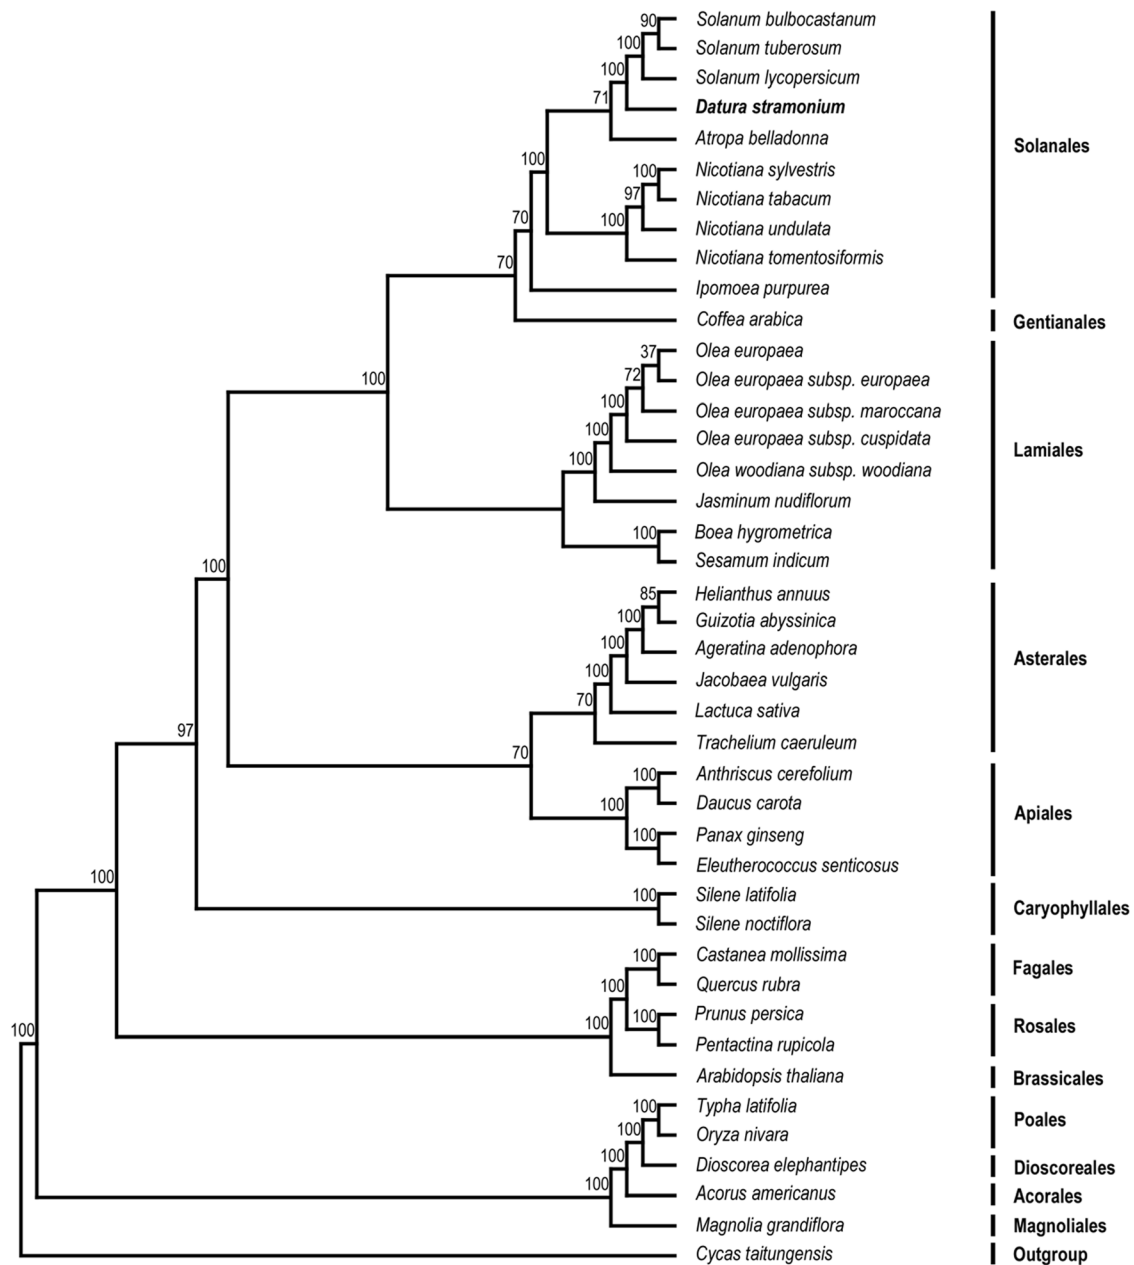

**Figure 6. The ML phylogenetic tree of the asteridae clade based on 68 protein-coding genes.** The ML tree was obtained with the -lnL of 356757.56 using the GTR+I+G nucleotide substitution model. Number above each node are bootstrap support values. *Cycas taitungensis* was set as outgroup.

doi:10.1371/journal.pone.0110656.g006

last decade, there have been many analyses to address phylogenetic questions at deep nodes based on comparison of multiple protein-coding genes [74–76] and complete sequences in chloroplast genomes [77,78], enhancing our understanding of enigmatic evolutionary relationships among angiosperms. However, further development of Asteridae phylogeny is typically limited due to sporadic taxon sampling. Phylogenetic analysis using maximum likelihood and maximum parsimony were performed based on 68 shared genes (Table S2) in 42 sequenced genomes, including the cp genome of *D. stramonium* sequenced in this study, to examine the position of *D. stramonium* and relationships within the Asteridae. Both trees have provided strong support for the position of *D. stramonium* as a sister to *Solanum lycopersicum*, followed by

*Atropa belladonna* (Figure 6 and Figure S1). The difference between the MP and ML trees involves the position of *Silene*, which is likely to be caused by long-branch attraction [79]. The asteridae, the largest and diverse subclass in angiosperm, includes more than 60,000 species and is widely distributed throughout the world. More taxon samplings should be required to clarify accurate relationships among asteridae.

### Implication for Chloroplast Genetic Engineering

Chloroplasts are distributed throughout the differentiated cells of plant organs and tissues. Over evolutionary time, cp genomes have given up most of their genes and cellular functions to become the energy transduction and metabolic center of plant cell [80].

The high copy number of chloroplast genomes makes it possible to provide an engineering of multiple foreign genes for the production of a metabolic pathway with a high transformation rate in contrast with nuclear transformation. Great progress in chloroplast engineering has been achieved since the first chloroplast genetic transformation succeeded two decades ago [81].

Although a number of plant species are transformable, plastid transformation is now routinely carried out only in tobacco [82]. In addition, while gene regulation is generally conserved, expression of a foreign gene may vary between different plant species [83]. The expression of a transgene can be affected by various factors such as the promoter, the 5' untranslated region (UTR), the downstream box, the N-terminal amino acid sequence, the codon usage, the 3' UTR and genes located upstream and downstream [83]. The efficiency of transformation in most plants remains too low. This study showed that *Datura stramonium* had an identical plastid genome structure and similar sequence relative to *Nicotiana tabacum*. The two plant species are very closely related in evolutionary relationship. In addition, many transformable species are from Solanaceae including tomato [84], petunia [85], eggplant [86] and potato [87]. *D. stramonium* may have great potential to become a model medicinal plant to carry out plant transformation. The availability of the complete cp genome sequence of *D. stramonium* is helpful to recognize the optimal regions for transgene integration and to develop site-specific cp transformation vectors.

*Datura stramonium* naturally grows in warm and temperate regions and does have a low tolerance for cold environments. They are not especially susceptible to pests, but will suffer from mealy bugs and aphids. In addition, *Datura* are propagated by seed. Young seedlings are very tolerant of poor soil and even drought but cannot tolerate herbicide. The plastid genome is an attractive location for the engineering of pest-resistance and herbicide-tolerance traits. Expression of insecticidal proteins and herbicide-tolerant enzymes from the chloroplast genome has proven to be a very efficient strategy for successful resistance management and weed control [88–92]. Plastid engineering should be particularly useful to develop resistant to abiotic and biotic stresses in molecular breeding of *D. stramonium*.

## Conclusions

This is the first study of complete cp genome of *Datura* species which can extract scopolamine. The gene order and genome organization of *D. stramonium* are similar to those of cp genomes in the Solanales. There are no significant structural rearrangements of Solanales cp genomes during the evolutionary process. Further, the repeated sequences, SSR and protein-coding gene sequence were determined. Phylogenetic relationships among 42 angiosperms provide a strong support for the position of *D. stramonium*. In addition, the data presented in this paper will

facilitate the further biological study in the field of phylogenomics and plant biotechnology of this important poisonous and medicinal plant.

## Supporting Information

**Figure S1** The MP phylogenetic tree of the asteridae clade based on 68 protein-coding genes. The MP tree has a length of 59,852, with a consistency index of 0.53 and a retention index of 0.68. Number above each node are bootstrap support values. *Cycas taitungensis* was set as outgroup. (TIF)

**Table S1** The list of accession numbers of the chloroplast genome sequences used in this study. (DOC)

**Table S2** Average pairwise sequence distance of protein-coding genes among 42 chloroplast genomes. (DOC)

**Table S3** Genes present in the *Datura stramonium* chloroplast genome. (DOC)

**Table S4** The genes with introns in the *Datura stramonium* chloroplast genome and the length of the exons and introns. (DOC)

**Table S5** Distribution of SSRs present in the CDS among 41 asteridae chloroplast genomes. (DOC)

**Table S6** Size comparison of 10 cp genomes in the order of Solanales. (DOC)

**Table S7** Comparison of homologues between the *Datura stramonium* and *Ipomoea purpurea* (*Ip*), *Nicotiana undulate* (*Nu*) or *Solanum tuberosum* (*St*) chloroplast genomes using the percent identity of protein-coding sequences. (DOC)

## Acknowledgments

The authors would like to thank the reviewers for their valuable comments and suggestions. We are also grateful to Robert Henry for his critical reading of the manuscript.

## Author Contributions

Conceived and designed the experiments: LQ LXW YY. Performed the experiments: LQ LXW YY. Analyzed the data: YY LXW. Contributed reagents/materials/analysis tools: LXW WYT. Wrote the paper: YY LXW LJJ DYY.

## References

- Zhang L, Ding R, Chai Y, Bonfill M, Moyano E, et al. (2004) Engineering tropane biosynthetic pathway in *Hyoscyamus niger* hairy root cultures. *Proc Natl Acad Sci U S A* 101: 6786–6791.
- Weissman B, Raveh L (2011) Multifunctional drugs as novel antidotes for organophosphates' poisoning. *Toxicology* 290: 149–155.
- Jakabova S, Vincze L, Farkas A, Kilar F, Boros B, et al. (2012) Determination of tropane alkaloids atropine and scopolamine by liquid chromatography-mass spectrometry in plant organs of *Datura* species. *Journal of Chromatography A* 1232: 295–301.
- Lacy BE, Wang F, Bhowal S, Schaefer E (2013) On-demand hyoscyine butylbromide for the treatment of self-reported functional cramping abdominal pain. *Scandinavian Journal of Gastroenterology* 48: 926–935.
- Klinkenberg I, Blokland A (2010) The validity of scopolamine as a pharmacological model for cognitive impairment: A review of animal behavioral studies. *Neuroscience and Biobehavioral Reviews* 34: 1307–1350.
- Liu S, Li LH, Shen WW, Shen XY, Yang GD, et al. (2013) Scopolamine Detoxification Technique for Heroin Dependence: A Randomized Trial. *Cns Drugs* 27: 1093–1102.
- Rasila Devi M, Bawari M, Paul S, Sharma G (2011) Neurotoxic and medicinal properties of *Datura stramonium* L.—review. *Assam University Journal of Science and Technology* 7: 139–144.
- Palazon J, Navarro-Ocana A, Hernandez-Vazquez L, Mirjalili MH (2008) Application of metabolic engineering to the production of scopolamine. *Molecules* 13: 1722–1742.

9. Moyano E, Joughikainen K, Tammela P, Palazon J, Cusido RM, et al. (2003) Effect of pmt gene overexpression on tropane alkaloid production in transformed root cultures of *Datura metel* and *Hyoscyamus muticus*. *J Exp Bot* 54: 203–211.
10. Pramod KK, Singh S, Jayabaskaran C (2010) Biochemical and structural characterization of recombinant hyoscyamine 6 beta-hydroxylase from *Datura metel* L. *Plant Physiology and Biochemistry* 48: 966–970.
11. Moyano E, Palazon J, Bonfill M, Osuna L, Cusido RM, et al. (2007) Biotransformation of hyoscyamine into scopolamine in transgenic tobacco cell cultures. *Journal of Plant Physiology* 164: 521–524.
12. Bendich AJ (1987) Why Do Chloroplasts and Mitochondria Contain So Many Copies of Their Genome. *Bioessays* 6: 279–282.
13. Hagemann R (2004) The sexual inheritance of plant organelles. *Molecular biology and biotechnology of plant organelles*: Springer. pp.93–113.
14. Li XW, Hu ZG, Lin XH, Li Q, Gao HH, et al. (2012) [High-throughput pyrosequencing of the complete chloroplast genome of *Magnolia officinalis* and its application in species identification]. *Acta pharmaceutica Sinica* 47: 124–130.
15. Wyman SK, Jansen RK, Boore JL (2004) Automatic annotation of organellar genomes with DOGMA. *Bioinformatics* 20: 3252–3255.
16. Schattner P, Brooks AN, Lowe TM (2005) The tRNAscan-SE, snoscan and snoGPS web servers for the detection of tRNAs and snoRNAs. *Nucleic Acids Research* 33: W686–W689.
17. Cui LY, Veeraraghavan N, Richter A, Wall K, Jansen RK, et al. (2006) ChloroplastDB: the chloroplast genome database. *Nucleic Acids Research* 34: D692–D696.
18. Lohse M, Drechsel O, Bock R (2007) OrganellarGenomeDRAW (OGDRAW): a tool for the easy generation of high-quality custom graphical maps of plastid and mitochondrial genomes. *Current Genetics* 52: 267–274.
19. Tamura K, Peterson D, Peterson N, Stecher G, Nei M, et al. (2011) MEGA5: Molecular Evolutionary Genetics Analysis Using Maximum Likelihood, Evolutionary Distance, and Maximum Parsimony Methods. *Molecular Biology and Evolution* 28: 2731–2739.
20. Kurtz S, Phillippy A, Delcher AL, Smoot M, Shumway M, et al. (2004) Versatile and open software for comparing large genomes. *Genome Biology* 5.
21. Frazer KA, Pachter L, Poliakov A, Rubin EM, Dubchak I (2004) VISTA: computational tools for comparative genomics. *Nucleic Acids Research* 32: W273–W279.
22. Librado P, Rozas J (2009) DnaSP v5: a software for comprehensive analysis of DNA polymorphism data. *Bioinformatics* 25: 1451–1452.
23. Kurtz S, Choudhuri JV, Ohlbeusch E, Schleiermacher C, Stoye J, et al. (2001) REPuter: the manifold applications of repeat analysis on a genomic scale. *Nucleic Acids Research* 29: 4633–4642.
24. Benson G (1999) Tandem repeats finder: a program to analyze DNA sequences. *Nucleic Acids Research* 27: 573–580.
25. Nie XJ, Lv SZ, Zhang YX, Du XH, Wang L, et al. (2012) Complete Chloroplast Genome Sequence of a Major Invasive Species, Crofton Weed (*Ageratina adenophora*). *Plos One* 7.
26. Thompson JD, Higgins DG, Gibson TJ (1994) Clustal-W - Improving the Sensitivity of Progressive Multiple Sequence Alignment through Sequence Weighting, Position-Specific Gap Penalties and Weight Matrix Choice. *Nucleic Acids Research* 22: 4673–4680.
27. Kimura M (1980) A Simple Method for Estimating Evolutionary Rates of Base Substitutions through Comparative Studies of Nucleotide-Sequences. *Journal of Molecular Evolution* 16: 111–120.
28. Stamatakis A (2006) RAxML-VI-HPC: maximum likelihood-based phylogenetic analyses with thousands of taxa and mixed models. *Bioinformatics* 22: 2688–2690.
29. Posada D, Crandall KA (1998) MODELTEST: testing the model of DNA substitution. *Bioinformatics* 14: 817–818.
30. Swofford DL, Sullivan J (2003) Phylogeny inference based on parsimony and other methods using PAUP\*. *The Phylogenetic Handbook: A Practical Approach to DNA and Protein Phylogeny*, chap 7: 160–206.
31. Yi DK, Kim KJ (2012) Complete Chloroplast Genome Sequences of Important Oilseed Crop *Sesamum indicum* L. *Plos One* 7.
32. Mariotti R, Cultrera NGM, Diez CM, Baldoni L, Rubini A (2010) Identification of new polymorphic regions and differentiation of cultivated olives (*Olea europaea* L.) through plastome sequence comparison. *Bmc Plant Biology* 10.
33. Zhang TW, Fang YJ, Wang XM, Deng X, Zhang XW, et al. (2012) The Complete Chloroplast and Mitochondrial Genome Sequences of *Boca hygrometrica*: Insights into the Evolution of Plant Organellar Genomes. *Plos One* 7.
34. Kim KJ, Lee HL (2004) Complete chloroplast genome sequences from Korean ginseng (*Panax schinseng* Nees) and comparative analysis of sequence evolution among 17 vascular plants. *DNA Research* 11: 247–261.
35. Shinozaki K, Ohme M, Tanaka M, Wakasugi T, Hayashida N, et al. (1986) The Complete Nucleotide-Sequence of the Tobacco Chloroplast Genome - Its Gene Organization and Expression. *Embo Journal* 5: 2043–2049.
36. Tangphatsomruang S, Sangsrakru D, Chanprasert J, Uthapaisanwong P, Yoocha T, et al. (2010) The chloroplast genome sequence of mungbean (*Vigna radiata*) determined by high-throughput pyrosequencing: structural organization and phylogenetic relationships. *DNA Reserach* 17: 11–22.
37. Clegg MT, Gaut BS, Learn GH Jr, Morton BR (1994) Rates and patterns of chloroplast DNA evolution. *Proc Natl Acad Sci U S A* 91: 6795–6801.
38. Chen C, Zhou P, Choi YA, Huang S, Gmitter Jr FG (2006) Mining and characterizing microsatellites from citrus ESTs. *Theoretical and Applied Genetics* 112: 1248–1257.
39. Gaire BP, Subedi L (2013) A review on the pharmacological and toxicological aspects of *Datura stramonium* L. *Journal of Chinese Integrative Medicine* 11: 73–79.
40. Fan Y (2007) Hou Han Shu: Hua tuo biographies. Beijing: Zhonghua book company press. 82 p.
41. Pretorius E, Marx J (2006) *Datura stramonium* in asthma treatment and possible effects on prenatal development. *Environmental Toxicology and Pharmacology* 21: 331–337.
42. Peredery O, Persinger MA (2004) Herbal treatment following post-seizure induction in rat by lithium pilocarpine: *Scutellaria lateriflora* (Skullcap), *Gelsemium sempervirens* (Gelsemium) and *Datura stramonium* (Jimson Weed) may prevent development of spontaneous seizures. *Phytotherapy Research* 18: 700–705.
43. Nimal Christudas IVS, Praveen Kumar P, Agastian P (2013) In vitro  $\alpha$ -glucosidase inhibition and antioxidative potential of an endophyte species (*Streptomyces* sp. Loyola UGC) isolated from *Datura stramonium* L. *Current Microbiology* 67: 69–76.
44. Eftekhari F, Yousefzadi M, Tafakori V (2005) Antimicrobial activity of *Datura innoxia* and *Datura stramonium*. *Fitoterapia* 76: 118–120.
45. Sharma A, Patel VK, Chaturvedi AN (2009) Antibacterial activity of certain medicinal plants used in Indian folkore medicine by tribals of Mahakoshal region of central India. *Indian Journal of Pharmacology* 41: 129–133.
46. Mdee LK, Masoko P, Eloff JN (2009) The activity of extracts of seven common invasive plant species on fungal phytopathogens. *South African Journal of Botany* 75: 375–379.
47. Sonika G MR, Deepak J (2010) Comparative studies on anti-inflammatory activity of *Coriandrum sativum*, *Datura stramonium* and *Azadirachta indica*. *Asian J Exp Biol Sci* 1(1): 151–154.
48. Raubeson LA, Peery R, Chumley TW, Dziubek C, Fourcade HM, et al. (2007) Comparative chloroplast genomics: analyses including new sequences from the angiosperms *Nuphar advena* and *Ranunculus macranthus*. *Bmc Genomics* 8.
49. Wicke S, Schneeweiss GM, dePamphilis CW, Muller KF, Quandt D (2011) The evolution of the plastid chromosome in land plants: gene content, gene order, gene function. *Plant Molecular Biology* 76: 273–297.
50. Bellgard M, Schibeci D, Trifonov E, Gojoberi T (2001) Early detection of G + C differences in bacterial species inferred from the comparative analysis of the two completely sequenced *Helicobacter pylori* strains. *J Mol Evol* 53: 465–468.
51. Goremykin VV, Hirsch-Ernst KI, Wölf S, Hellwig FH (2003) Analysis of the *Amborella trichopoda* chloroplast genome sequence suggests that *Amborella* is not a basal angiosperm. *Molecular biology and evolution* 20: 1499–1505.
52. Schmitz-Linneweber C, Maier RM, Alcaraz JP, Cottet A, Herrmann RG, et al. (2001) The plastid chromosome of spinach (*Spinacia oleracea*): complete nucleotide sequence and gene organization. *Plant Molecular Biology* 45: 307–315.
53. Steane DA (2005) Complete nucleotide sequence of the chloroplast genome from the Tasmanian blue gum, *Eucalyptus globulus* (Myrtaceae). *DNA Research* 12: 215–220.
54. Nair RR, Nandhini MB, Monalisha E, Murugan K, Sethuraman T, et al. (2012) Synonymous codon usage in chloroplast genome of *Coffea arabica*. *Bioinformation* 8: 1096.
55. Morton BR (2003) The role of context-dependent mutations in generating compositional and codon usage bias in grass chloroplast DNA. *J Mol Evol* 56: 616–629.
56. Wolfe KH, Morden CW, Palmer JD (1992) Function and evolution of a minimal plastid genome from a nonphotosynthetic parasitic plant. *Proc Natl Acad Sci U S A* 89: 10648–10652.
57. Iannacone R, Grieco PD, Cellini F (1997) Specific sequence modifications of a cry3B endotoxin gene result in high levels of expression and insect resistance. *Plant Molecular Biology* 34: 485–496.
58. Rouwendal GJA, Mendes O, Wolbert EJH, deBoer AD (1997) Enhanced expression in tobacco of the gene encoding green fluorescent protein by modification of its codon usage. *Plant Molecular Biology* 33: 989–999.
59. Bulmer M (1988) Are Codon Usage Patterns in Unicellular Organisms Determined by Selection-Mutation Balance. *Journal of Evolutionary Biology* 1: 15–26.
60. Xu J, Feng D, Song G, Wei X, Chen L, et al. (2003) The first intron of rice EPSP synthase enhances expression of foreign gene. *Sci China C Life Sci* 46: 561–569.
61. Powell W, Morgante M, Andre C, Mcnicol JW, Machray GC, et al. (1995a) Hypervariable Microsatellites Provide a General Source of Polymorphic DNA Markers for the Chloroplast Genome. *Current Biology* 5: 1023–1029.
62. Powell W, Morgante M, McDevitt R, Vendramin GG, Rafalski JA (1995b) Polymorphic simple sequence repeat regions in chloroplast genomes: applications to the population genetics of pines. *Proc Natl Acad Sci U S A* 92: 7759–7763.
63. Li X, Gao H, Wang Y, Song J, Henry R, et al. (2013) Complete chloroplast genome sequence of *Magnolia grandiflora* and comparative analysis with related species. *Sci China Life Sci* 56: 189–198.
64. Qian J, Song J, Gao H, Zhu Y, Xu J, et al. (2013) The complete chloroplast genome sequence of the medicinal plant *Salvia miltiorrhiza*. *PLoS One* 8: e57607.

65. Pombert JF, Otis C, Lemieux C, Turmel M (2005) Chloroplast genome sequence of the green alga *Pseudoclonium akinetum* (Ulvophyceae) reveals unusual structural features and new insights into the branching order of chlorophyte lineages. *Molecular Biology and Evolution* 22: 1903–1918.
66. Chumley TW, Palmer JD, Mower JP, Fourcade HM, Calic PJ, et al. (2006) The complete chloroplast genome sequence of *Pelargonium x hortorum*: Organization and evolution of the largest and most highly rearranged chloroplast genome of land plants. *Molecular Biology and Evolution* 23: 2175–2190.
67. Haberle RC, Fourcade HM, Boore JL, Jansen RK (2008) Extensive rearrangements in the chloroplast genome of *Trachelium caeruleum* are associated with repeats and tRNA genes. *Journal of Molecular Evolution* 66: 350–361.
68. Kawata M, Harada T, Shimamoto Y, Oono K, Takaiwa F (1997) Short inverted repeats function as hotspots of intermolecular recombination giving rise to oligomers of deleted plastid DNAs (ptDNAs). *Current Genetics* 31: 179–184.
69. Ravi V, Khurana JP, Tyagi AK, Khurana P (2008) An update on chloroplast genomes. *Plant Systematics and Evolution* 271: 101–122.
70. Huotari T, Korpelainen H (2012) Complete chloroplast genome sequence of *Elodea canadensis* and comparative analyses with other monocot plastid genomes. *Gene* 508: 96–105.
71. Neubig KM, Whitten WM, Carlswald BS, Blanco MA, Endara L, et al. (2009) Phylogenetic utility of *yef1* in orchids: a plastid gene more variable than *matK*. *Plant Systematics and Evolution* 277: 75–84.
72. Dong W, Liu J, Yu J, Wang L, Zhou S (2012) Highly Variable Chloroplast Markers for Evaluating Plant Phylogeny at Low Taxonomic Levels and for DNA Barcoding. *PLoS ONE* 7: e35071.
73. Li X, Yang Y, Henry RJ, Rossetto M, Wang Y, et al. (2014) Plant DNA barcoding: from gene to genome. *Biological Reviews*. doi:10.1111/brv.12104
74. De las Rivas J, Lozano JJ, Ortiz AR (2002) Comparative analysis of chloroplast genomes: Functional annotation, genome-based phylogeny, and deduced evolutionary patterns. *Genome Research* 12: 567–583.
75. Lemieux C, Otis C, Turmel M (2000) Ancestral chloroplast genome in *Mesostigma viride* reveals an early branch of green plant evolution. *Nature* 403: 649–652.
76. Moore MJ, Soltis PS, Bell CD, Burleigh JG, Soltis DE (2010) Phylogenetic analysis of 83 plastid genes further resolves the early diversification of eudicots. *Proceedings of the National Academy of Sciences of the United States of America* 107: 4623–4628.
77. Moore MJ, Bell CD, Soltis PS, Soltis DE (2007) Using plastid genome-scale data to resolve enigmatic relationships among basal angiosperms. *Proceedings of the National Academy of Sciences of the United States of America* 104: 19363–19368.
78. Goremykin VV, Hirsch-Ernst KI, Wolf S, Hellwig FH (2004) The chloroplast genome of *Nymphaea alba*: Whole-genome analyses and the problem of identifying the most basal angiosperm. *Molecular Biology and Evolution* 21: 1445–1454.
79. Bergsten J (2005) A review of long-branch attraction. *Cladistics* 21: 163–193.
80. Heifetz PB, Tuttle AM (2001) Protein expression in plastids. *Current Opinion in Plant Biology* 4: 157–161.
81. Boynton JE, Gillham NW, Harris EH, Hosler JP, Johnson AM, et al. (1988) Chloroplast Transformation in *Chlamydomonas* with High-Velocity Microprojectiles. *Science* 240: 1534–1538.
82. Wang HH, Yin WB, Hu ZM (2009) Advances in chloroplast engineering. *Journal of Genetics and Genomics* 36: 387–398.
83. Hanson MR, Gray BN, Ahner BA (2013) Chloroplast transformation for engineering of photosynthesis. *Journal of Experimental Botany* 64: 731–742.
84. Ruf S, Hermann M, Berger IJ, Carrer H, Bock R (2001) Stable genetic transformation of tomato plastids and expression of a foreign protein in fruit. *Nature Biotechnology* 19: 870–875.
85. Zubko MK, Zubko EI, van Zuilten K, Meyer P, Day A (2004) Stable transformation of petunia plastids. *Transgenic Research* 13: 523–530.
86. Singh AK, Verma SS, Bansal KC (2010) Plastid transformation in eggplant (*Solanum melongena* L.). *Transgenic Research* 19: 113–119.
87. Sidorov VA, Kasten D, Pang SZ, Hajdukiewicz PTJ, Staub JM, et al. (1999) Stable chloroplast transformation in potato: use of green fluorescent protein as a plastid marker. *Plant Journal* 19: 209–216.
88. Kota M, Daniell H, Varma S, Garczynski SF, Gould F, et al. (1999) Overexpression of the *Bacillus thuringiensis* (Bt) *Cry2Aa2* protein in chloroplasts confers resistance to plants against susceptible and Bt-resistant insects. *Proceedings of the National Academy of Sciences of the United States of America* 96: 1840–1845.
89. De Cosa B, Moar W, Lec SB, Miller M, Daniell H (2001) Overexpression of the Bt *cry2Aa2* operon in chloroplasts leads to formation of insecticidal crystals. *Nature Biotechnology* 19: 71–74.
90. Lutz KA, Knapp JE, Maliga P (2001) Expression of *bar* in the plastid genome confers herbicide resistance. *Plant Physiology* 125: 1585–1590.
91. Ye GN, Colburn SM, Xu CW, Hajdukiewicz PT, Staub JM (2003) Persistence of unselected transgenic DNA during a plastid transformation and segregation approach to herbicide resistance. *Plant Physiol* 133: 402–410.
92. Dufourmantel N, Dubald M, Matringe M, Canard H, Garçon F, et al. (2007) Generation and characterization of soybean and marker-free tobacco plastid transformants over-expressing a bacterial 4-hydroxyphenylpyruvate dioxygenase which provides strong herbicide tolerance. *Plant biotechnology journal* 5: 118–133.
